# Supplementary material for: The Inhibitory Effects of Cyclodepsipeptides from the Entomopathogenic Fungus Beauveria bassiana on Myofibroblast Differentiation in A549 Alveolar Epithelial Cells
Source: PubMed Central journal article supplement (PMC6222899; doi:10.3390/molecules23102568), 2018-10-08

## Supporting Information

### The Inhibitory Effects of Cyclodepsipeptides from the Entomopathogenic Fungus *Beauveria bassiana* on Myofibroblast Differentiation in A549 Alveolar Epithelial Cells

Yong Joo Park <sup>1,#</sup>, Seoung Rak Lee <sup>1,#</sup>, Dong Min Kim <sup>1</sup>, Jae Sik Yu <sup>1</sup>, Christine Beemelmans <sup>2</sup>, Kyu Hyuck Chung <sup>1</sup> and Ki Hyun Kim <sup>1,\*</sup>

<sup>1</sup> School of Pharmacy, Sungkyunkwan University, Suwon 16419, Republic of Korea; [pyj084@msn.com](mailto:pyj084@msn.com) (Y.J.P.); [davidseoungarak@gmail.com](mailto:davidseoungarak@gmail.com) (S.R.L); [kdm9947@gmail.com](mailto:kdm9947@gmail.com) (D.M.K.); [jsyu@bu.edu](mailto:jsyu@bu.edu) (J.S.Y.); [khchung@skku.edu](mailto:khchung@skku.edu) (K.H.C.)

<sup>2</sup> Leibniz Institute for Natural Product Research and Infection Biology – Hans-Knöll-Institute, Beutenbergstraße 11a, 07745 Jena, Germany; [Christine.beemelmans@hki-jena.de](mailto:Christine.beemelmans@hki-jena.de) (C.B.)

# These authors contributed equality to this work.

\* Corresponding author:

Ki Hyun Kim, Tel: +82-31-290-7700; Fax: +82-31-290-7730; E-mail: [khkim83@skku.edu](mailto:khkim83@skku.edu)

## Supporting Information Contents:

|                                                                                                                                                                                               |   |
|-----------------------------------------------------------------------------------------------------------------------------------------------------------------------------------------------|---|
| <b>Figure S1.</b> The $^1\text{H}$ NMR spectrum of <b>1</b> (Pyridine- $d_5$ , 800 MHz).....                                                                                                  | 3 |
| <b>Figure S2.</b> The $^1\text{H}$ NMR spectrum of <b>2</b> (Pyridine- $d_5$ , 800 MHz).....                                                                                                  | 4 |
| <b>Figure S3.</b> The $^1\text{H}$ NMR spectrum of <b>3</b> ( $\text{CD}_3\text{OD}$ , 800 MHz).....                                                                                          | 5 |
| <b>Figure S4.</b> The $^1\text{H}$ NMR spectrum of <b>4</b> (Pyridine- $d_5$ , 800 MHz) .....                                                                                                 | 6 |
| <b>Figure S5.</b> UV chromatogram of LC/MS (detection wavelength was set as 210 nm) of the MeOH extract of the culture broth from the entomopathogenic fungus <i>Beauveria bassiana</i> ..... | 7 |
| <b>Figure S6.</b> The LC/MS-guided isolation of compounds <b>1</b> and <b>2</b> .....                                                                                                         | 8 |
| <b>Figure S7.</b> The LC/MS-guided isolation of compounds <b>3</b> and <b>4</b> .....                                                                                                         | 9 |

**Figure S1.** The  $^1\text{H}$  NMR spectrum of **1** (Pyridine- $d_5$ , 800 MHz)

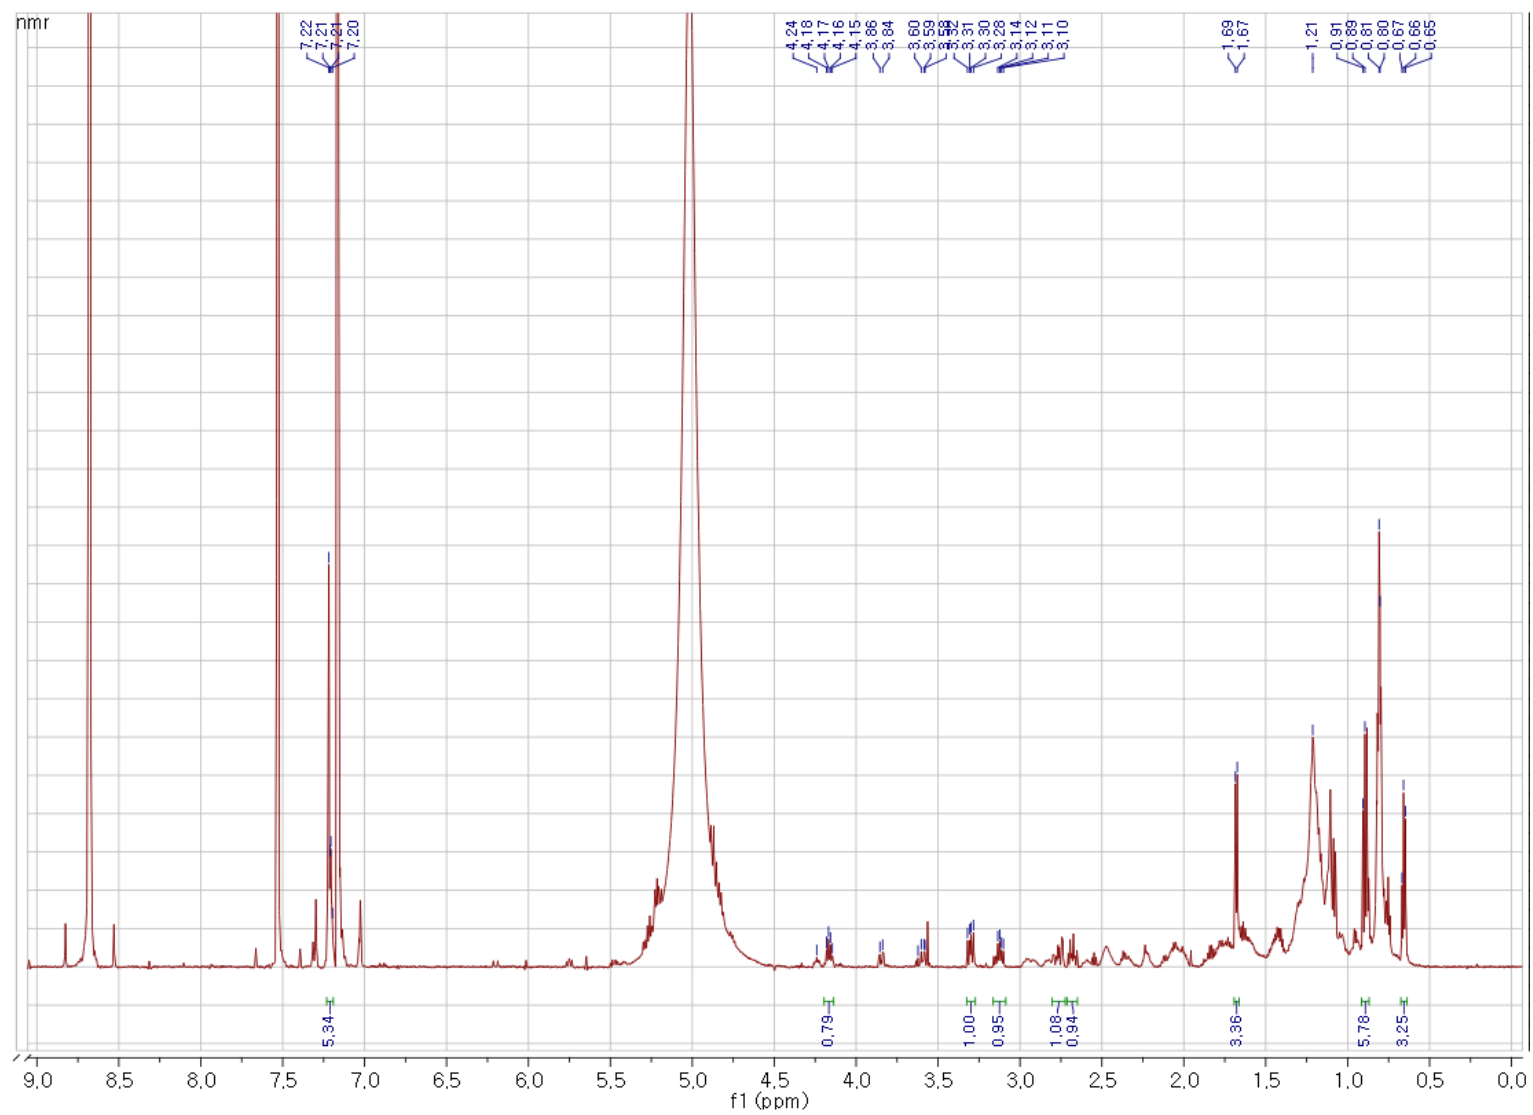

**Figure S2.** The  $^1\text{H}$  NMR spectrum of **2** (Pyridine- $d_5$ , 800 MHz)

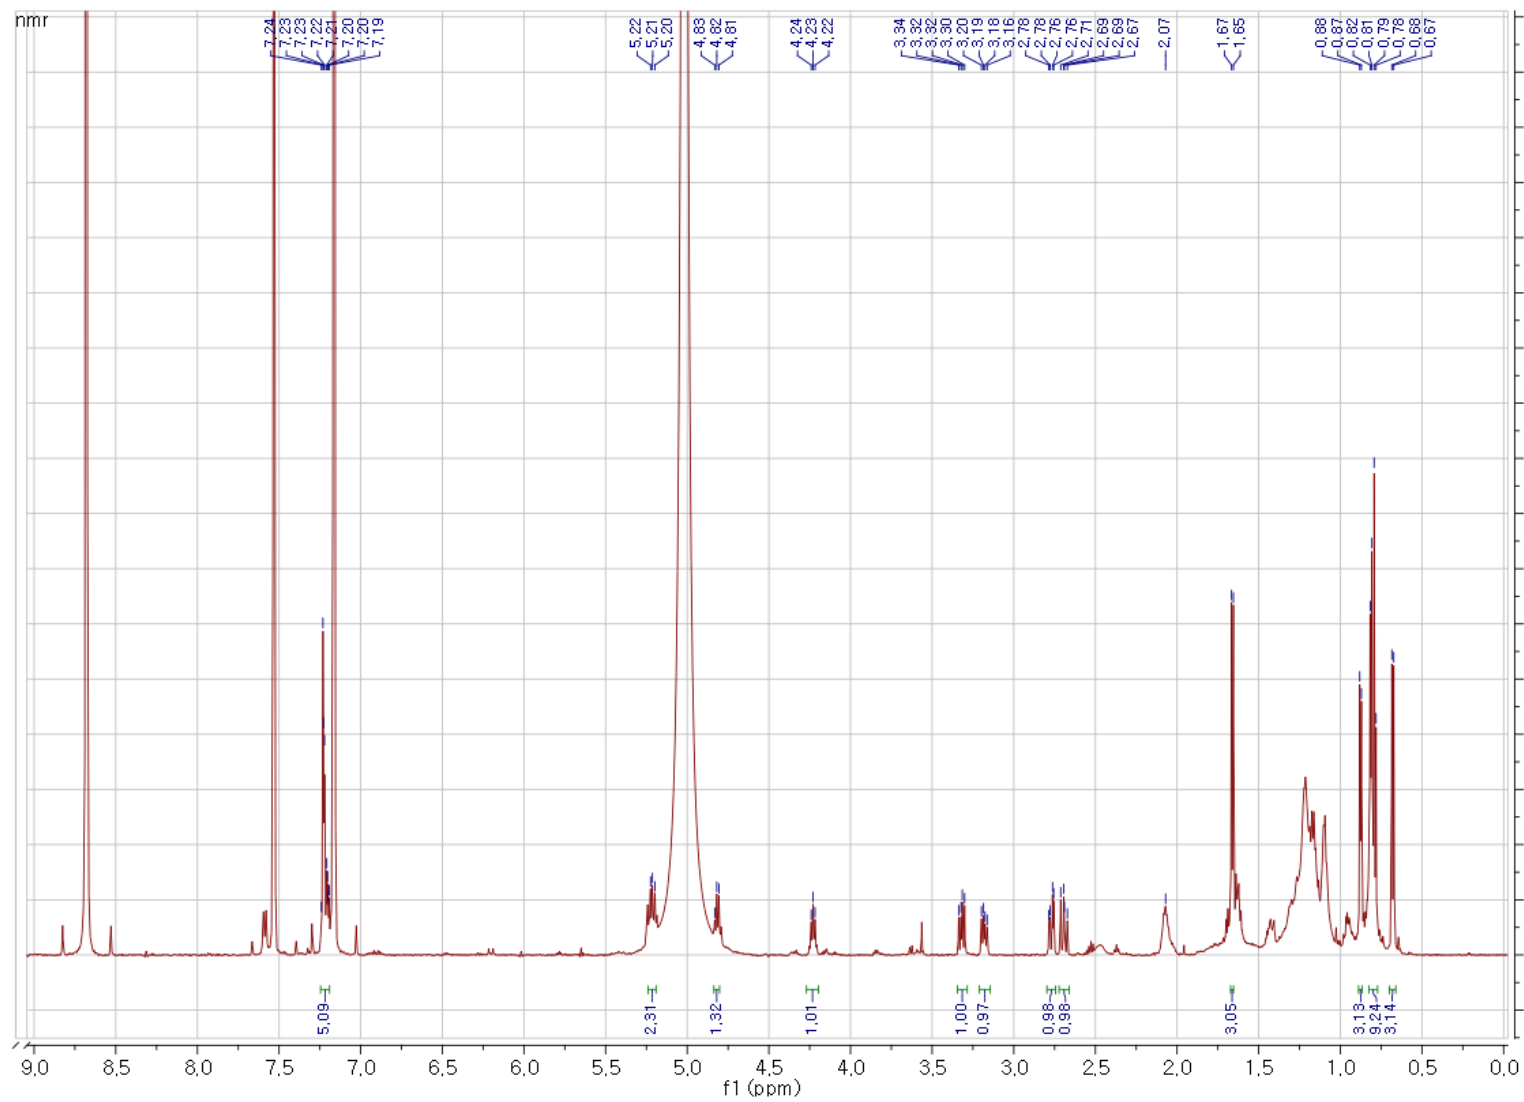

**Figure S3.** The  $^1\text{H}$  NMR spectrum of **3** ( $\text{CD}_3\text{OD}$ , 800 MHz)

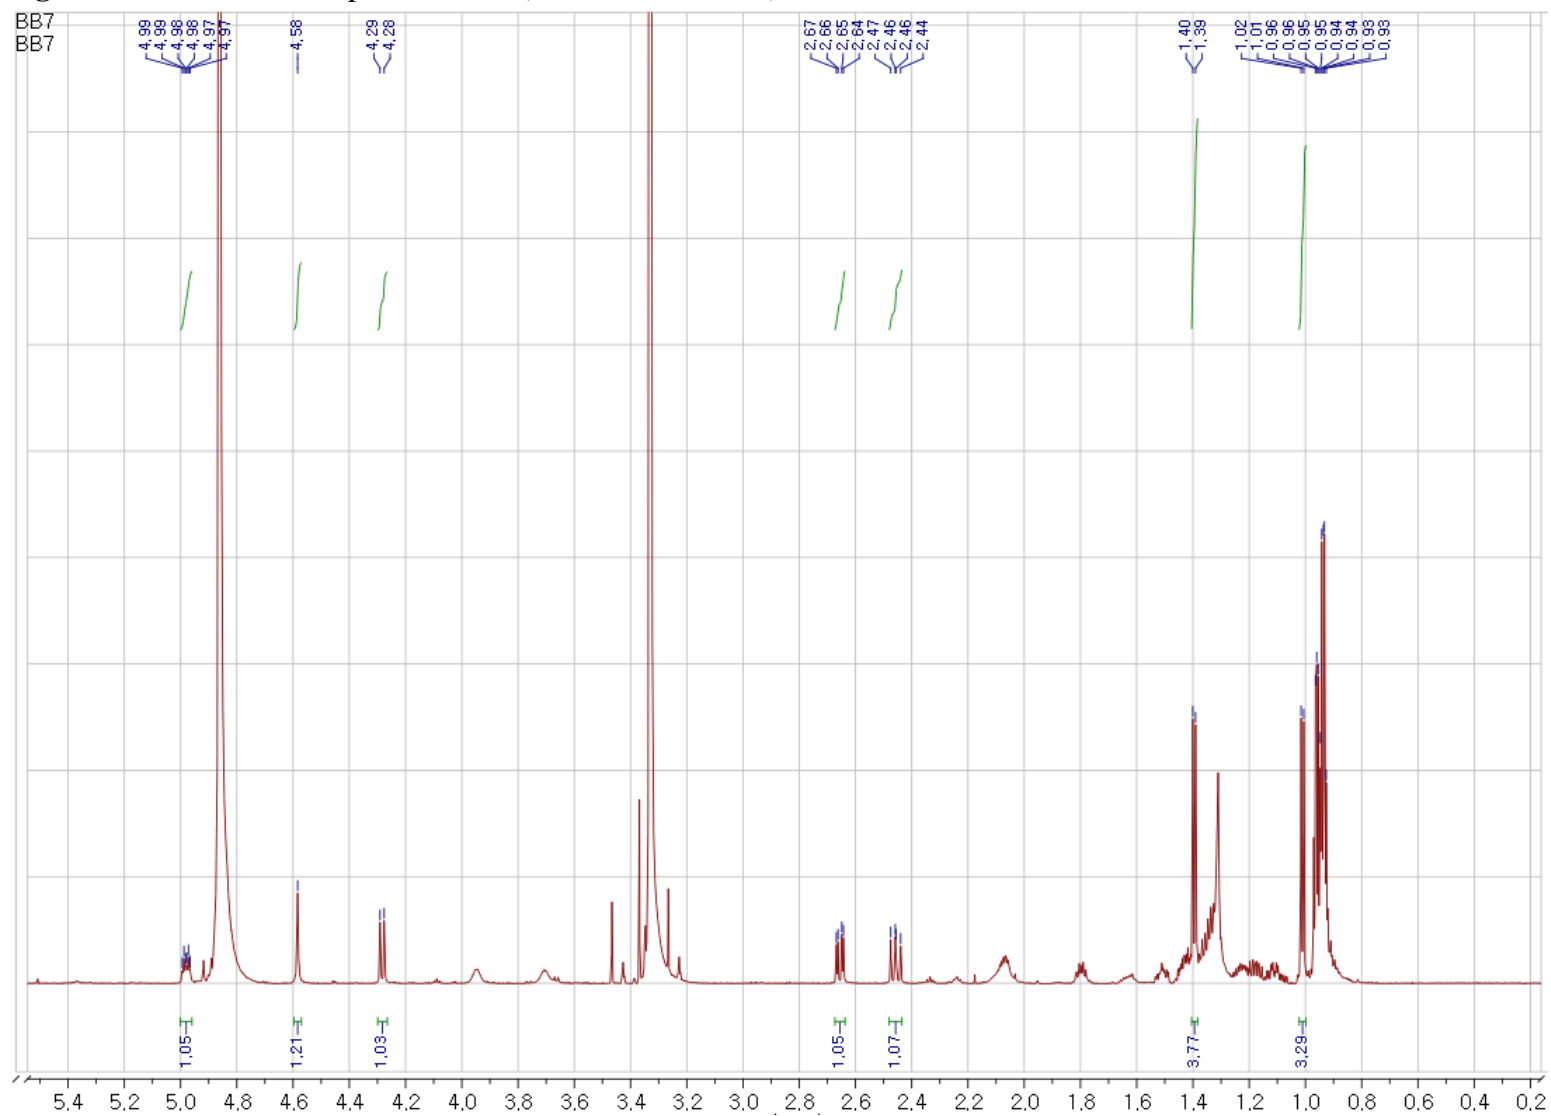

**Figure S4.** The  $^1\text{H}$  NMR spectrum of **4** (Pyridine- $d_5$ , 800 MHz)

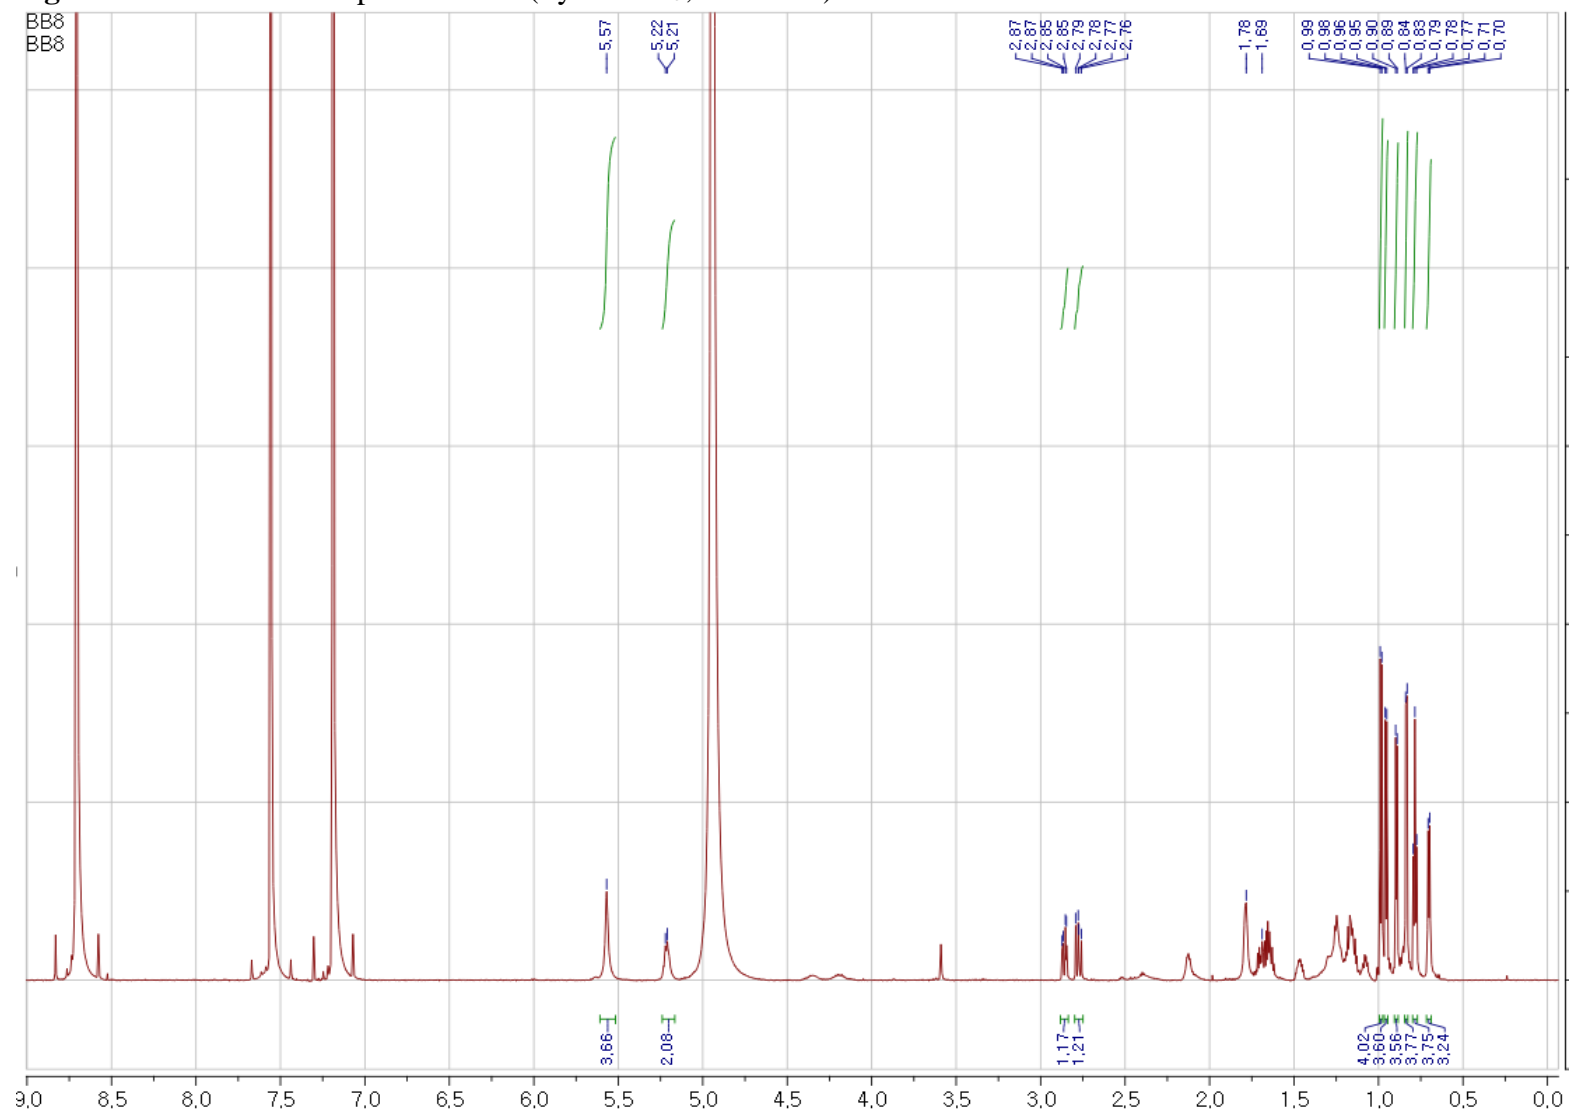

**Figure S5.** UV chromatogram of LC/MS (detection wavelength was set as 210 nm) of the MeOH extract of the culture broth from the entomopathogenic fungus *Beauveria bassiana*

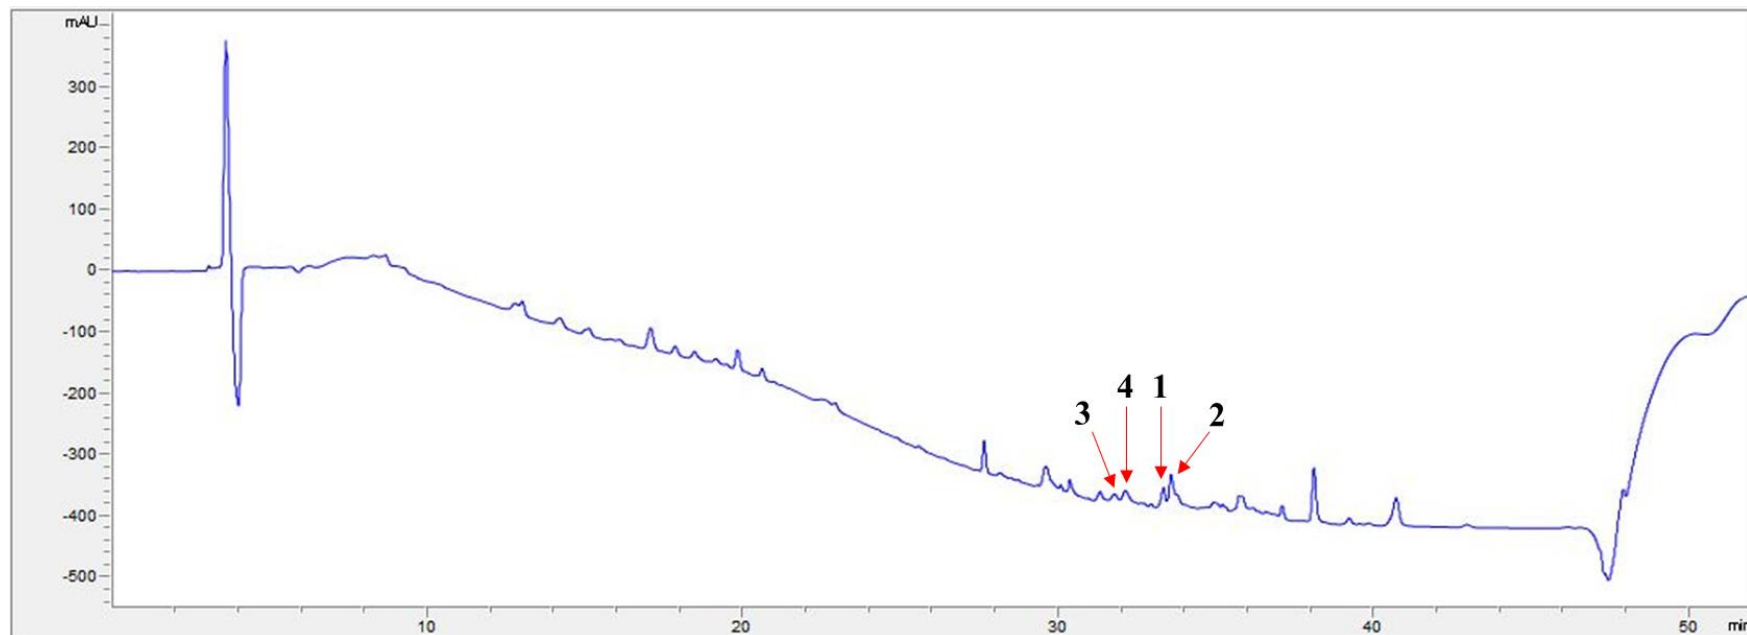

*LC/MS analysis:*

The MeOH extract of the culture broth from *B. bassiana* was analyzed by LC/MS. Briefly, stock solution of the MeOH extract was prepared by dissolving 1 mg of sample in 1 mL methanol. The solution was further diluted with methanol to provide a solution of 100 µg/mL. The solution was filtered through a 0.45 µm hydrophobic PTFE filter and analyzed by LC/MS (Agilent Technologies, Santa Clara, CA, USA) using a LC-MS Agilent 1200 Series analytical system equipped with a photodiode array (PDA) detector combined with a 6130 Series ESI mass spectrometer. Analysis was performed by injection of 5 µL of the sample using a Phenomenex Luna C18 (4.6 × 100 mm, 3.5 µm) and the full scan in positive and negative ion modes (scan range  $m/z$  100 to 1000) was applied. The mobile phase consisting of formic acid in H<sub>2</sub>O [0.1% (v/v)] (A) and methanol (B) was delivered at a flow rate of 0.3 mL/min by applying the following programmed gradient elution: 10%-100% (B) for 30 min, 100% (B) for 1 min, 100% (B) isocratic for 10 min, and then 10% (B) isocratic for 10 min, to perform post-run reconditioning of the column.

**Figure S6.** The LC/MS-guided isolation of compounds **1** and **2**

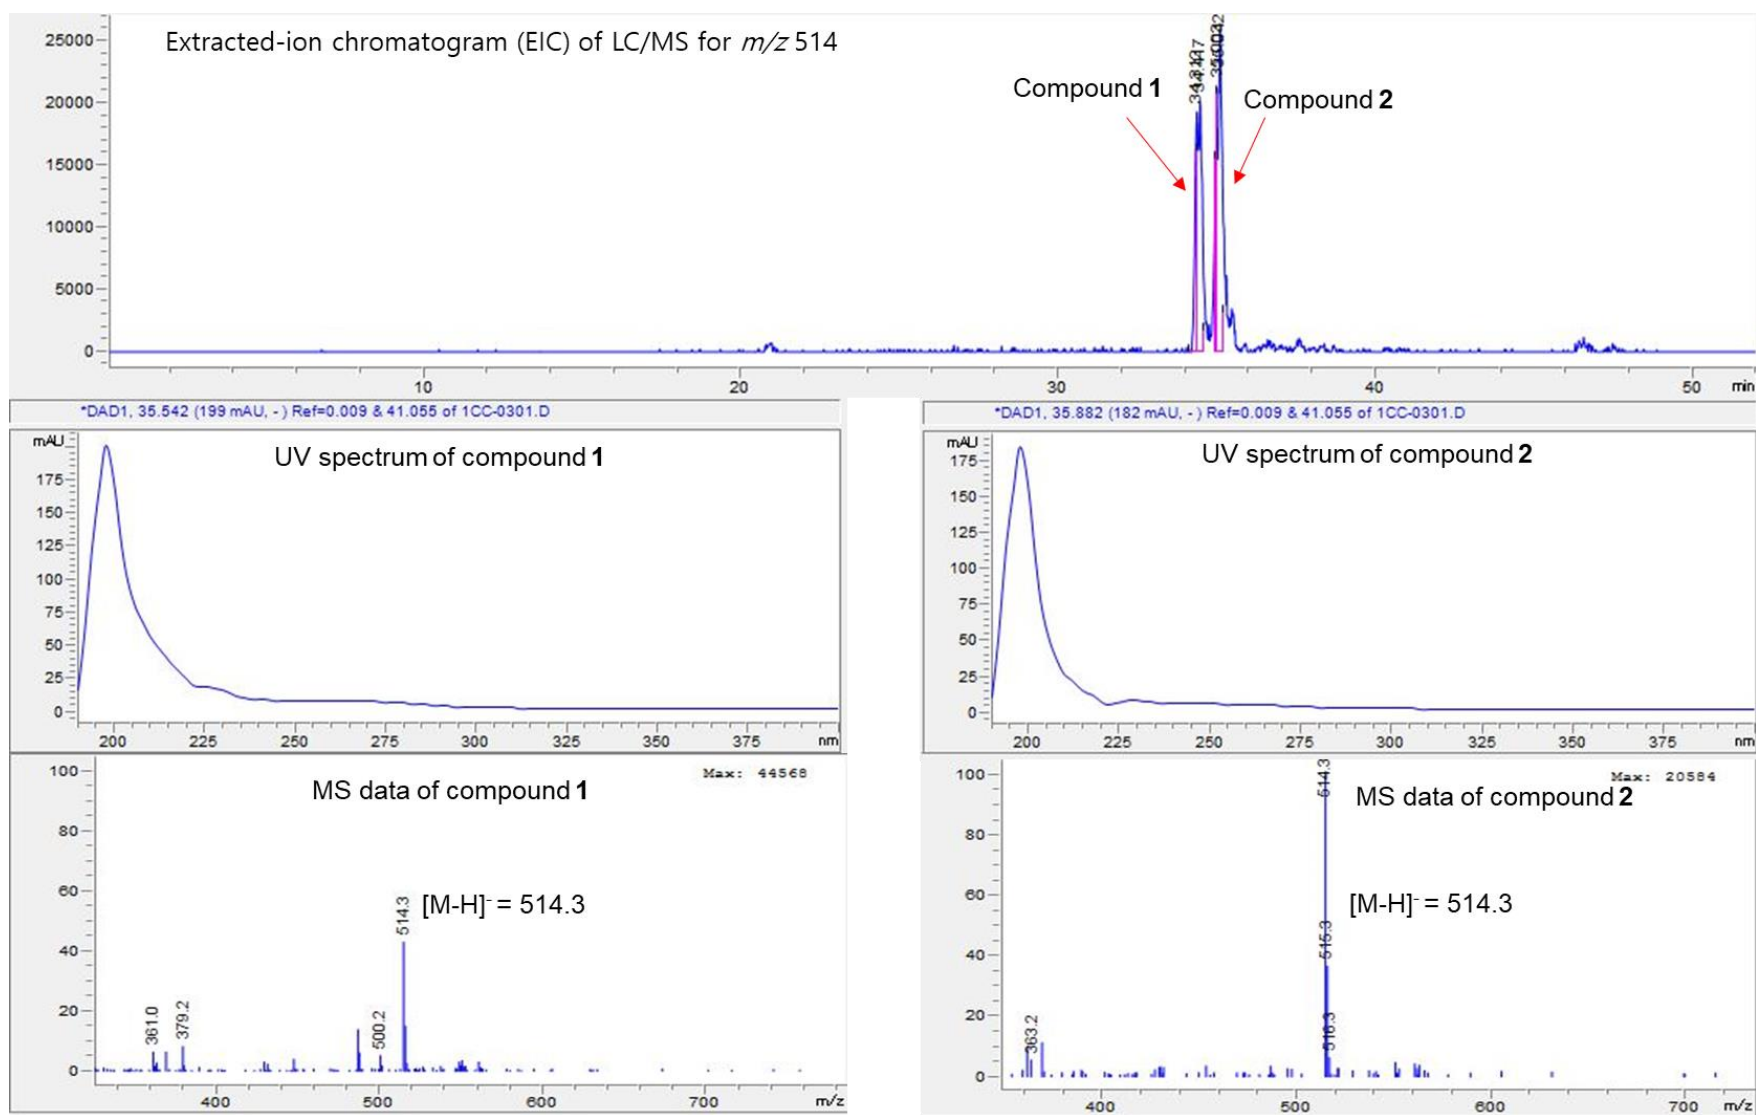



**Figure S7.** The LC/MS-guided isolation of compounds **3** and **4**

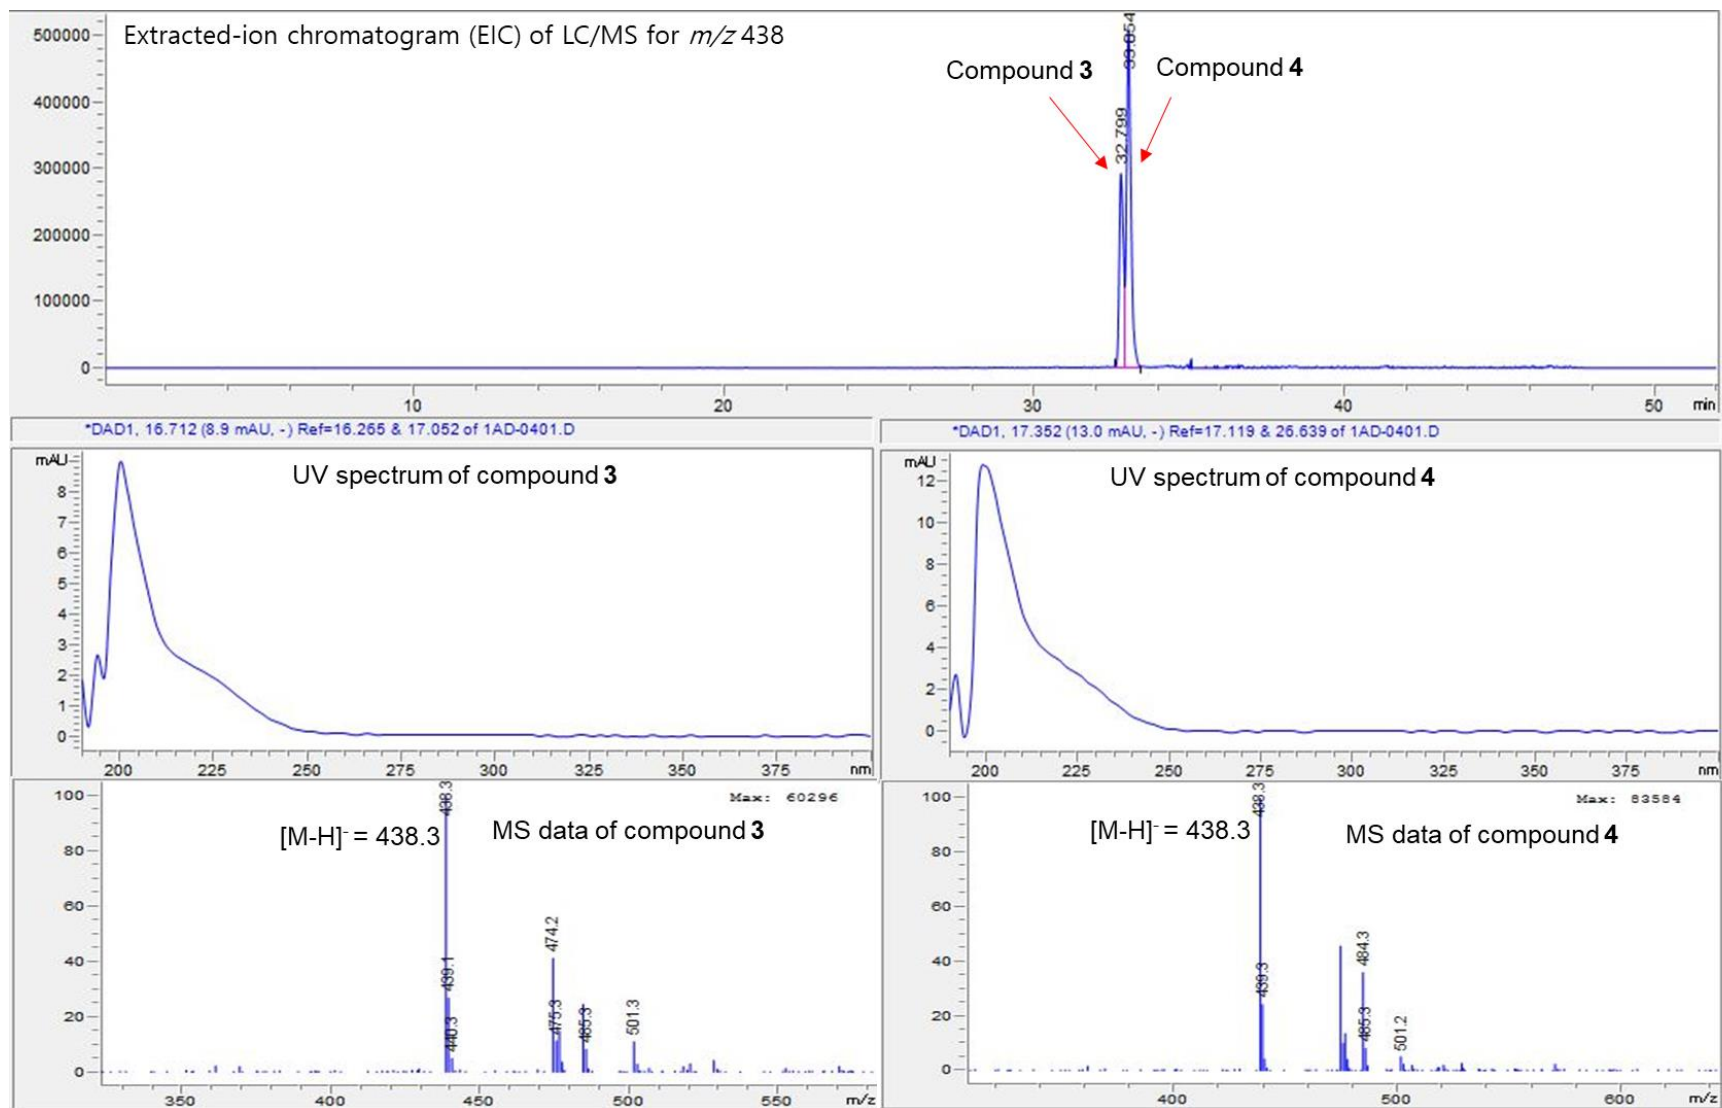

Supplement: molecules-23-02568-s001.pdf [file molecules-23-02568-s001.pdf]
